# Supplementary material
Source: PubMed Central journal article supplement (PMC3948807)
Supplement: supp_113.152991_FigureS11.pdf [file supp_113.152991_FigureS11.pdf]

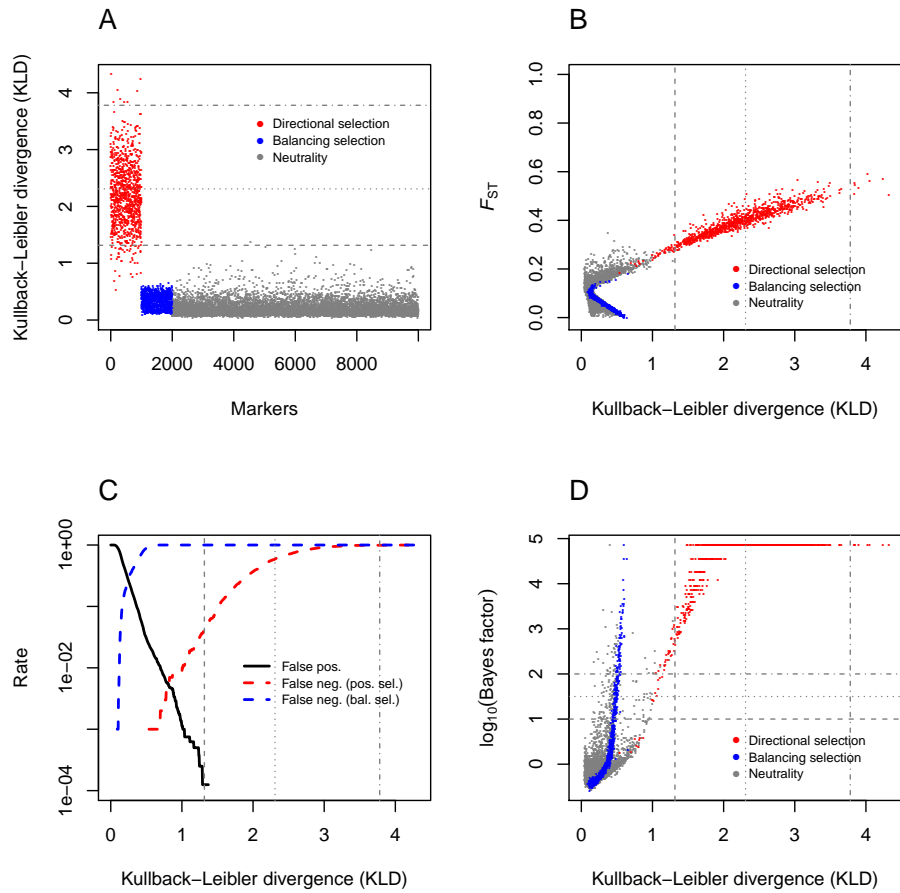

**Figure S11** Analysis of the allele count data from dataset 11. (A) Kullback–Leibler divergence (KLD) measure between the posterior of  $\delta_j$  and its centering distribution for all simulated loci. Loci under positive selection are depicted in red, loci under balancing selection in blue, and neutral markers are in grey. (B)  $F_{ST}$  as a function of the KLD measure for all loci. (C) False positive (neutral loci detected as outliers) and false negative (selected loci not detected as outliers) rates as a function of the KLD measure. (D) Relationship between the Bayes factor  $\log_{10}(\text{BF})$  from the BAYESCAN analysis of dataset 11 and the KLD. The horizontal lines in (A) and the vertical lines in (B–D) indicate the KLD thresholds corresponding to the 95%-, the 99%-, and the 99.9%-quantile of the of the KLD distribution from the pod analysis of dataset 11. In (D), the horizontal lines indicate the  $\log_{10}(\text{BF}) = 1$ ,  $\log_{10}(\text{BF}) = 1.5$  and  $\log_{10}(\text{BF}) = 2$  thresholds, which correspond to “strong”, “very strong” and “decisive” support, respectively, following Jeffreys’ (1961) scale of evidence.
