# Supplementary material
Source: PubMed Central journal article supplement (PMC3948807)
Supplement: supp_113.152991_FigureS19.pdf [file supp_113.152991_FigureS19.pdf]

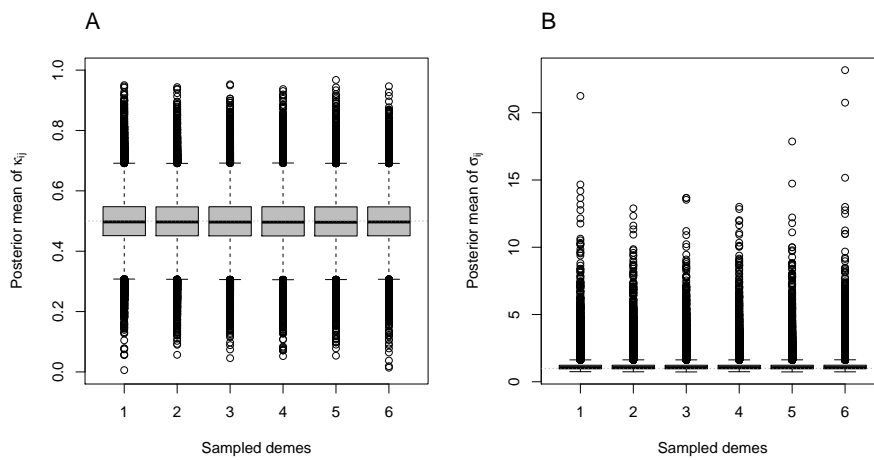

**Figure S19** Analysis of the allele count data from a simulation of 50,000 neutral markers. The simulation was performed according to an island model with  $n_d = 50$  “uncolored” demes, each made of  $N = 250$  diploid individuals (500 genes). Samples were collected in six demes (50 individuals per deme). The migration rate was chosen to achieve the expected value of  $F_{ST} = 0.15$ , using equation 6 in Rousset (1996). The realized value was  $F_{ST} = 0.153$  (multilocus estimate). (A) Boxplot representation of the posterior means of the parameters  $\kappa_{ij}$  (that indicate which allele is selected for) for the 50,000 neutral markers in “uncolored” demes (1–6). (B) Boxplot representation of the posterior means of the selection coefficients  $\sigma_{ij}$  for the 50,000 neutral markers (unconditional on  $\kappa_{ij}$ ). The horizontal dotted line indicates the prior mean  $\sigma_{ij} = 1$
