# Supplementary material
Source: PubMed Central journal article supplement (PMC3948807)
Supplement: supp_113.152991_FigureS20.pdf [file supp_113.152991_FigureS20.pdf]

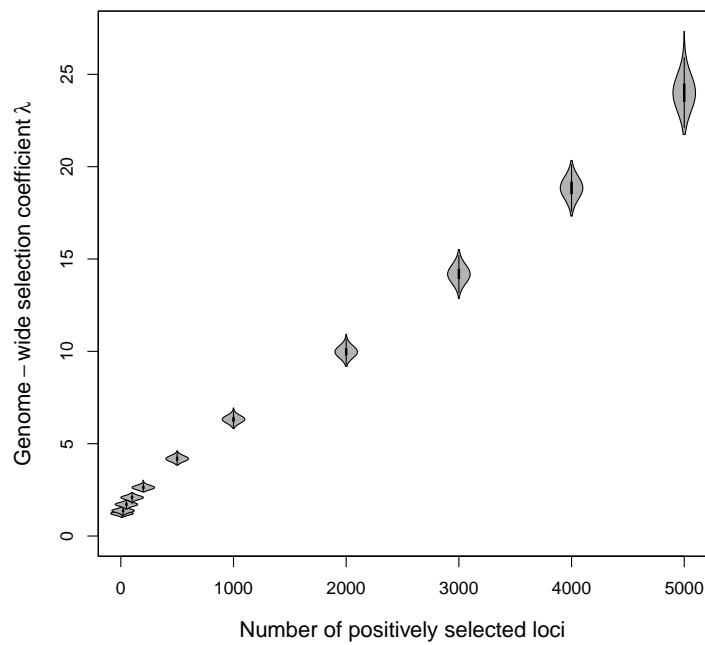

**Figure S20** Posterior distributions (violin plot representation) of the genome-wide coefficient of selection  $\lambda$  as a function of the number of positively selected loci. We used the same parameter as for dataset 5 (see Table 1), but varying the proportion of selected loci from 10 to 5,000 out of 10,000 markers (hence, from 0.1% to 50%).
