# Supplementary material
Source: PubMed Central journal article supplement (PMC3948807)
Supplement: supp_113.152991_FigureS22.pdf [file supp_113.152991_FigureS22.pdf]

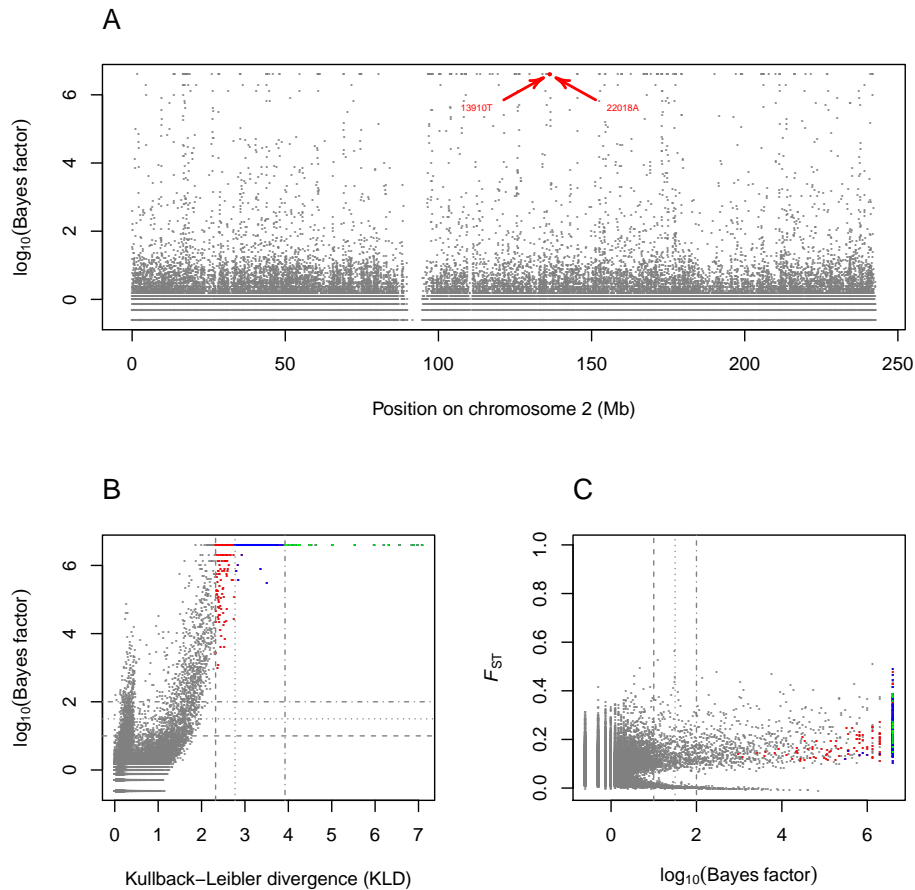

**Figure S22** (A) BAYESCAN Bayes factor for the CEPH dataset analyses, along chromosome 2. The alleles -13910T and -22018A associated with lactase persistence are indicated in red. (B) Joint distribution of BAYESCAN Bayes factor and the Kullback–Leibler divergence (KLD) measure for all loci in the dataset. Markers in green have  $\text{KLD} \geq 3.924$ , which corresponds to the 99.9%-quantile of the of the KLD distribution from the pod analysis; markers in blue have  $\text{KLD} \geq 2.772$ , which corresponds to the 99.5%-quantile of the of the KLD distribution from the pod analysis; markers in red have  $\text{KLD} \geq 2.324$ , which corresponds to the 99%-quantile of the of the KLD distribution from the pod analysis. (C) Joint distribution  $F_{ST}$  and BAYESCAN Bayes factor for all loci in the dataset.
