# Supplementary material
Source: PubMed Central journal article supplement (PMC3948807)
Supplement: supp_113.152991_FileS1.pdf [file supp_113.152991_FileS1.pdf]

## File S1

### Details on the componentwise Markov chain Monte Carlo algorithm

Here we provide the computational details for the componentwise Markov chain Monte Carlo updates. Our aim is to sample from the joint posterior distribution of  $f(\mathbf{M}, \pi, \kappa, \sigma, \delta, \lambda | \mathbf{n})$ , which is specified by equation (4) and by the directed acyclic graph (DAG) in Figure 1. To do so, we use a combination of the Metropolis–Hastings algorithm and the Gibbs sampler for generating observations from  $f(\mathbf{M}, \pi, \kappa, \sigma, \delta, \lambda | \mathbf{n})$  using outputs from a Markov chain (see, e.g., Gelman *et al.* 2004).

Each Markov chain is initialized with random values of the parameters drawn from their prior densities, except for the parameters  $p_{ij}$ , for which the observed frequencies are used, and the parameters  $\pi_j$ s, for which the Laplace values are calculated from the dataset frequencies. The updating sequence is as follows: (i) all  $L n_d$  parameters  $p_{ij}$ ; (ii) all  $n_d$  parameters  $M_i$ ; (iii) all  $L$  parameters  $\pi_j$ ; (iv) the hyperparameter  $\lambda$ ; (v) all  $L$  hyperparameters  $\delta_j$ ; (vi) all  $L n_d$  parameters  $\sigma_{ij}$ ; (vii) all  $L n_d$  parameters  $\kappa_{ij}$ . Since the full posterior distribution of the model can be decomposed as a product over loci and over populations (see equation 4), each update only requires the re-computation of the relevant terms of the distribution  $f(\mathbf{M}, \pi, \kappa, \sigma, \delta, \lambda | \mathbf{n})$ . This improves the computational efficiency of the algorithm considerably.

The confluent hypergeometric, or Kummer’s, functions  ${}_1F_1(a; b; z)$  (see, e.g., Abramowitz and Stegun 1965, p. 504) were computed following a procedure proposed by Pearson (Pearson 2009), which is based on the power series definition of the function:

$${}_1F_1(a; b; z) = \sum_{j=0}^{\infty} \underbrace{\frac{(a)_j z^j}{(b)_j j!}}_{A_j}, \quad (\text{S1.1})$$

where, for some parameter  $p$ , the Pochhammer symbol  $(p)_j$  is defined as:

$$(p)_0 = 1, \quad (p)_j = p(p+1) \dots (p+j-1), \quad \text{for } j = 1, 2, \dots \quad (\text{S1.2})$$

The computation of the terms of the power series in equation (S1.1) can then be car-

ried out using the following procedure:

$$\begin{aligned}
A_0 &= S_0 = 1, \\
A_{j+1} &= A_j \frac{a+j}{b+j} \frac{z}{j+1}, \\
S_{j+1} &= S_j + A_{j+1}, \quad \text{for } j = 1, 2, \dots
\end{aligned} \tag{S1.3}$$

where  $A_j$  represents the  $(j+1)$ th term of the power series in equation (S1.1), and  $S_j$  represents the sum of the first  $(j+1)$  terms. The computation was stopped when both  $|A_N|/|S_{N-1}| < 10^{-12}$  and  $|A_{N+1}|/|S_N| < 10^{-12}$ . This criterion is equivalent to truncating the series in equation (S1.1), and requires that two consecutive terms to be small compared to the sum already computed.

**Updating  $p_{ij}$ :** The parameters  $p_{ij}$  are updated iteratively in each deme, one locus at a time. In the  $i$ th deme, at locus  $j$ , one allele is chosen at random from a Bernoulli trial with probability 0.5. The new allele frequency  $p'_{ij}$  is chosen as a random variable drawn from a uniform distribution around the current value  $p_{ij}$ :

$$p'_{ij} \sim U(p_{ij} - \Delta_p, p_{ij} + \Delta_p). \tag{S1.4}$$

The size of the interval  $\Delta_p$  is a constant, which is adjusted during 25 short pilot runs of 1,000 iterations, in order to get acceptance rates between 0.25 and 0.40 (see, e.g., Gilks *et al.* 1996). Since  $p_{ij}$  is a frequency comprised between 0 and 1, if  $p'_{ij}$  is outside the interval  $[0, 1]$ , the excess is reflected back into the interval; that is, if  $p'_{ij} < 0$  then  $p'_{ij}$  is reset to its absolute value  $|p'_{ij}|$ , and if  $p'_{ij} > 1$  then  $p'_{ij}$  is reset to  $2 - p'_{ij}$ . This proposal is symmetric (Yang 2005). The updated allele frequency  $p'_{ij}$  is therefore accepted according to the appropriate Metropolis probability, which reads:

$$1 \wedge \frac{\mathcal{L}(p'_{ij}; \mathbf{n}_{ij}) \psi(p'_{ij}; M_i, \pi_j, \kappa_{ij}, \sigma_{ij})}{\mathcal{L}(p_{ij}; \mathbf{n}_{ij}) \psi(p_{ij}; M_i, \pi_j, \kappa_{ij}, \sigma_{ij})}. \tag{S1.5}$$

Equation (S1.5) can be rewritten as

$$1 \wedge \exp \left[ \sigma_{ij} (\tilde{p}'_{ij} - \tilde{p}_{ij}) \right] \frac{p'_{ij}^{x_{ij} + M_i \pi_j - 1} (1 - p'_{ij})^{(n_{ij} - x_{ij}) M_i + (1 - \pi_j) - 1}}{p_{ij}^{x_{ij} + M_i \pi_j - 1} (1 - p_{ij})^{(n_{ij} - x_{ij}) M_i + (1 - \pi_j) - 1}}, \quad (\text{S1.6})$$

where  $\tilde{p}'_{ij} \equiv \kappa_{ij}(1 - p'_{ij}) + (1 - \kappa_{ij})p'_{ij}$ .

**Updating  $M_i$ :** The parameters  $M_i$  are updated iteratively, one deme at a time. The proposed value  $M'_i$  is drawn from a lognormal distribution with median equal to the current value  $M_i$ , i.e.:

$$q(M_i \rightarrow M'_i) = \frac{1}{M'_i \nu_M \sqrt{2\pi}} \exp \left( \frac{-\ln(M'_i/M_i)^2}{2\nu_M^2} \right), \quad (\text{S1.7})$$

where  $\nu_M$  is the standard deviation on the log scale. The standard deviation  $\nu_M$  is a constant, which is adjusted during 25 short pilot runs of 1,000 iterations, in order to get acceptance rates between 0.25 and 0.40. Because the lognormal jumping rule is asymmetric, a Metropolis–Hastings update is required in which the Metropolis ratio is weighted by the ratio of the forward and reverse proposal densities (which is sometimes referred to as the ‘‘Hastings term’’: see, e.g., Gelman *et al.* 2004, p. 291). This means that when some moves are more likely to happen (because of the asymmetry of the proposal distribution), their probability of acceptance is decreased proportionately. Here, the ratio  $q(M'_i \rightarrow M_i)/q(M_i \rightarrow M'_i)$  reduces to  $M'_i/M_i$ . In order to avoid computational problems with excessively small or large  $M_i$  values, all moves falling outside the interval  $[0.0011, 000]$  are discarded (i.e., the chain is kept unchanged). Otherwise, the proposed value  $M'_i$  is accepted according to the appropriate Metropolis–Hastings probability, which is:

$$1 \wedge \frac{\left[ \prod_{j=1}^L \psi(p_{ij}; M'_i, \pi_j, \kappa_{ij}, \sigma_{ij}) \right] f(M'_i) q(M'_i \rightarrow M_i)}{\left[ \prod_{j=1}^L \psi(p_{ij}; M_i, \pi_j, \kappa_{ij}, \sigma_{ij}) \right] f(M_i) q(M_i \rightarrow M'_i)}. \quad (\text{S1.8})$$

Equation (S1.8) can be rewritten as

$$1 \wedge \left[ \frac{\Gamma(M_i)}{\Gamma(M'_i)} \right]^L \frac{\prod_{j=1}^L \Gamma(M_i \pi_j) \Gamma(M_i(1 - \pi_j)) {}_1F_1(M_i \tilde{\pi}_{ij}; M_i; \sigma_{ij}) p_{ij}^{M_i \pi_j} (1 - p_{ij})^{M_i(1 - \pi_j)}}{\prod_{j=1}^L \Gamma(M'_i \pi_j) \Gamma(M'_i(1 - \pi_j)) {}_1F_1(M'_i \tilde{\pi}_{ij}; M'_i; \sigma_{ij}) p_{ij}^{M'_i \pi_j} (1 - p_{ij})^{M'_i(1 - \pi_j)}} \quad (\text{S1.9})$$

**Updating  $\pi_j$ :** The parameters  $\pi_j$  are updated iteratively, one locus at a time. In the  $i$ th deme, at locus  $j$ , one allele is chosen at random from a Bernoulli trial with probability 0.5. The proposed allele frequency  $\pi'_j$  is chosen as a random variable drawn from a uniform distribution around the current value  $\pi_j$ :

$$\pi'_j \sim U(\pi_j - \Delta_\pi, \pi_j + \Delta_\pi). \quad (\text{S1.10})$$

The size of the interval  $\Delta_\pi$  is a constant, which is adjusted during 25 short pilot runs of 1,000 iterations, in order to get acceptance rates between 0.25 and 0.40. Since  $\pi_j$  is a frequency comprised between 0 and 1, if  $\pi'_j$  is outside the interval  $[0, 1]$ , the excess is reflected back into the interval; that is, if  $\pi'_j < 0$  then  $\pi'_j$  is reset to its absolute value  $|\pi'_j|$ , and if  $\pi'_j > 1$  then  $\pi'_j$  is reset to  $2 - \pi'_j$ . This proposal is symmetric, and the updated allele frequency  $\pi'_j$  is therefore accepted according to the appropriate Metropolis probability, which reads:

$$1 \wedge \frac{\left[ \prod_{i=1}^{n_d} \psi(p_{ij}; M_i, \pi'_j, \kappa_{ij}, \sigma_{ij}) \right] f(\pi'_j)}{\left[ \prod_{i=1}^{n_d} \psi(p_{ij}; M_i, \pi_j, \kappa_{ij}, \sigma_{ij}) \right] f(\pi_j)}. \quad (\text{S1.11})$$

Equation (S1.11) can be rewritten as

$$1 \wedge \frac{\prod_{i=1}^{n_d} \Gamma(M_i \pi_j) \Gamma(M_i(1 - \pi_j)) {}_1F_1(M_i \tilde{\pi}_{ij}; M_i; \sigma_{ij}) p_{ij}^{M_i \pi_j} (1 - p_{ij})^{M_i(1 - \pi_j)}}{\prod_{i=1}^{n_d} \Gamma(M_i \pi'_j) \Gamma(M_i(1 - \pi'_j)) {}_1F_1(M_i \tilde{\pi}'_{ij}; M_i; \sigma_{ij}) p_{ij}^{M_i \pi'_j} (1 - p_{ij})^{M_i(1 - \pi'_j)}}, \quad (\text{S1.12})$$

where  $\tilde{\pi}'_{ij} \equiv \kappa_{ij}(1 - \pi'_j) + (1 - \kappa_{ij})\pi'_j$ .

**Updating  $\lambda$ :** The proposed value of the hyperparameter  $\lambda'$  is drawn from a lognormal distribution with median equal to the current value  $\lambda$ , i.e.:

$$q(\lambda \rightarrow \lambda') = \frac{1}{\lambda' \nu_\lambda \sqrt{2\pi}} \exp\left(\frac{-\ln(\lambda'/\lambda)^2}{2\nu_\lambda^2}\right), \quad (\text{S1.13})$$

where  $\nu_\lambda$  is the standard deviation on the log scale. The standard deviation  $\nu_\lambda$  is a constant, which is adjusted during 25 short pilot runs of 1,000 iterations, in order to get acceptance rates between 0.25 and 0.40. Because the lognormal jumping rule is asymmetric, a Metropolis–Hastings update is required in which the Metropolis ratio is weighted by the ratio of the forward and reverse proposal densities. This means that when some moves are more likely to happen (because of the asymmetry of the proposal distribution), their probability of acceptance is decreased proportionately. Here, the ratio  $q(\lambda' \rightarrow \lambda)/q(\lambda \rightarrow \lambda')$  reduces to  $\lambda'/\lambda$ . In order to avoid computational problems with excessively small or large  $\lambda'$  values, all moves falling outside the interval  $[0, 500]$  are discarded (i.e., the chain is kept unchanged). Otherwise, the proposed value  $\lambda'$  is accepted according to the appropriate Metropolis–Hastings probability, which is:

$$1 \wedge \frac{\left[\prod_{j=1}^L f(\delta_j|\lambda')\right] f(\lambda'|\Lambda)q(\lambda' \rightarrow \lambda)}{\left[\prod_{j=1}^L f(\delta_j|\lambda)\right] f(\lambda|\Lambda)q(\lambda \rightarrow \lambda')}. \quad (\text{S1.14})$$

Equation (S1.14) can be rewritten as

$$1 \wedge \left(\frac{\lambda}{\lambda'}\right)^{L-1} \exp\left[(\lambda' - \lambda) \left(\frac{\sum_{j=1}^L \delta_j}{\lambda\lambda'} - \frac{1}{\Lambda}\right)\right] \quad (\text{S1.15})$$

**Updating  $\delta_j$ :** The parameters  $\delta_j$  are updated iteratively, one locus at a time. The proposed value of the hyperparameters  $\delta'_j$  is drawn from a lognormal distribution with median equal to the current value  $\delta_j$ , i.e.:

$$q(\delta_j \rightarrow \delta'_j) = \frac{1}{\delta'_j \nu_\delta \sqrt{2\pi}} \exp\left(\frac{-\ln(\delta'_j/\delta_j)^2}{2\nu_\delta^2}\right), \quad (\text{S1.16})$$

where  $\nu_\delta$  is the standard deviation on the log scale. The standard deviation  $\nu_\delta$  is a constant, which is adjusted during 25 short pilot runs of 1,000 iterations, in order to get acceptance rates between 0.25 and 0.40. Because the lognormal jumping rule is asymmetric, a Metropolis–Hastings update is required in which the Metropolis ratio is weighted by the ratio of the forward and reverse proposal densities. This means that when some moves are more likely to happen (because of the asymmetry of the proposal distribution), their probability of acceptance is decreased proportionately. Here, the ratio  $q(\delta'_j \rightarrow \delta_j)/q(\delta_j \rightarrow \delta'_j)$  reduces to  $\delta'_j/\delta_j$ . In order to avoid computational problems with excessively small or large  $\delta_j$  values, all moves falling outside the interval  $[0, 500]$  are discarded (i.e., the chain is kept unchanged). Otherwise, the proposed value  $\delta'_j$  is accepted according to the appropriate Metropolis–Hastings probability, which is:

$$1 \wedge \frac{\left[ \prod_{i=1}^{n_d} f(\sigma_{ij}|\delta'_j) \right] f(\delta'_j|\lambda)q(\delta'_j \rightarrow \delta_j)}{\left[ \prod_{i=1}^{n_d} f(\sigma_{ij}|\delta_j) \right] f(\delta_j|\lambda)q(\delta_j \rightarrow \delta'_j)}. \quad (\text{S1.17})$$

Equation (S1.17) can be rewritten as

$$1 \wedge \left( \frac{\delta_j}{\delta'_j} \right)^{n_d-1} \exp \left[ (\delta'_j - \delta_j) \left( \frac{\sum_{i=1}^{n_d} \sigma_{ij}}{\delta_j \delta'_j} - \frac{1}{\lambda} \right) \right] \quad (\text{S1.18})$$

**Updating  $\sigma_{ij}$ :** The parameters  $\sigma_{ij}$  are updated iteratively in each deme, one locus at a time. In the  $i$ th deme, at locus  $j$ , the proposed value of the parameters  $\sigma'_{ij}$  is drawn from a lognormal distribution with median equal to the current value  $\sigma_{ij}$ , i.e.:

$$q(\sigma_{ij} \rightarrow \sigma'_{ij}) = \frac{1}{\sigma'_{ij} \nu_\sigma \sqrt{2\pi}} \exp \left( -\frac{\ln(\sigma'_{ij}/\sigma_{ij})^2}{2\nu_\sigma^2} \right), \quad (\text{S1.19})$$

where  $\nu_\sigma$  is the standard deviation on the log scale. The standard deviation  $\nu_\sigma$  is a constant, which is adjusted during 25 short pilot runs of 1,000 iterations, in order to get acceptance rates between 0.25 and 0.40. Because the lognormal jumping rule is asymmetric, a Metropolis–Hastings update is required in which the Metropolis ratio is weighted by the ratio of the forward and reverse proposal densities. This means that

when some moves are more likely to happen (because of the asymmetry of the proposal distribution), their probability of acceptance is decreased proportionately. Here, the ratio  $q(\sigma'_{ij} \rightarrow \sigma_{ij})/q(\sigma_{ij} \rightarrow \sigma'_{ij})$  reduces to  $\sigma'_{ij}/\sigma_{ij}$ . In order to avoid computational problems with excessively small or large  $\sigma_{ij}$  values, all moves falling outside the interval  $[0, 500]$  are discarded (i.e., the chain is kept unchanged). Otherwise, the proposed value  $\sigma'_{ij}$  is accepted according to the appropriate Metropolis–Hastings probability, which is:

$$\frac{\psi(p_{ij}; M_i, \pi_j, \kappa_{ij}, \sigma'_{ij})f(\sigma'_{ij}|\delta_j)q(\sigma'_{ij} \rightarrow \sigma_{ij})}{\psi(p_{ij}; M_i, \pi_j, \kappa_{ij}, \sigma_{ij})f(\sigma_{ij}|\delta_j)q(\sigma_{ij} \rightarrow \sigma'_{ij})}. \quad (\text{S1.20})$$

Equation (S1.20) can be rewritten as

$$\frac{\sigma'_{ij}}{\sigma_{ij}} \exp \left[ (\sigma'_{ij} - \sigma_{ij}) \left( \tilde{p}_{ij} - \frac{1}{\delta_j} \right) \right] \frac{{}_1F_1(M_i \tilde{\pi}_{ij}; M_i; \sigma_{ij})}{{}_1F_1(M_i \tilde{\pi}_{ij}; M_i; \sigma'_{ij})}. \quad (\text{S1.21})$$

**Updating  $\kappa_{ij}$ :** The parameters  $\kappa_{ij}$  are updated iteratively in each deme, one locus at a time. In the  $i$ th deme, at locus  $j$ , the variable  $\kappa_{ij}$ , which indicates which of the two alleles is selected for, is updated using Gibbs sampling based on the conditional posterior distribution:

$$f(\kappa_{ij}|\theta_{[-\kappa_{ij}]}) \propto \psi(p_{ij}; M_i, \pi_j, \kappa_{ij}, \sigma_{ij})f(\kappa_{ij}), \quad (\text{S1.22})$$

where  $\theta_{[-\kappa_{ij}]}$  represents all the model parameters but  $\kappa_{ij}$ . Since  $\kappa_{ij}$  can only take two integer values (0 and 1), it can be shown that:

$$\Pr(\kappa_{ij} = 0|\theta_{[-\kappa_{ij}]}) \propto \frac{1}{2} \left[ \frac{\exp[\sigma_{ij}p_{ij}]}{{}_1F_1(M_i \pi_j; M_i; \sigma_{ij})} \right], \quad (\text{S1.23})$$

and

$$\Pr(\kappa_{ij} = 1|\theta_{[-\kappa_{ij}]}) \propto \frac{1}{2} \left[ \frac{\exp[\sigma_{ij}(1-p_{ij})]}{{}_1F_1(M_i(1-\pi_j); M_i; \sigma_{ij})} \right]. \quad (\text{S1.24})$$

Therefore, the conditional posterior distribution of  $\left(\kappa_{ij}|\theta_{[-\kappa_{ij}]}\right)$  from equation (S1.22) can be rewritten as

$$\left(\kappa_{ij}|\theta_{[-\kappa_{ij}]}\right) \sim \text{Bernoulli}(\rho), \quad (\text{S1.25})$$

where

$$\begin{aligned} \rho &\equiv \frac{\Pr(\kappa_{ij} = 0|\theta_{[-\kappa_{ij}]})}{\Pr(\kappa_{ij} = 0|\theta_{[-\kappa_{ij}]}) + \Pr(\kappa_{ij} = 1|\theta_{[-\kappa_{ij}]})} \\ &= \left[1 + \frac{{}_1F_1(M_i\pi_{ij}; M_i; \sigma_{ij})}{{}_1F_1(M_i(1 - \pi_{ij}); M_i; \sigma_{ij})} \exp[\sigma_{ij}(1 - 2p_{ij})]\right]^{-1}. \quad (\text{S1.26}) \end{aligned}$$



### Literature Cited

Abramowitz, M., and I. A. Stegun, 1965 *Handbook of Mathematical Functions*. Dover Publication, Inc., New York.

Gelman, A., J. B. Carlin, H. S. Stern, and D. B. Rubin, 2004 *Bayesian Data Analysis*. Chapman & Hall, New York, 2nd edition.

Gilks, W. R., S. Richardson, and D. J. Spiegelhalter, 1996 *Markov Chain Monte Carlo in Practice*. Chapman & Hall, New York, 2nd edition.

Pearson, J., 2009 *Computation of Hypergeometric Functions*. Ph.D. thesis, University of Oxford.

Yang, Z., 2005 Bayesian inference in molecular phylogenetics. In O. Gascuel, editor, *Mathematics of Evolution and Phylogeny*. Oxford University Press, Oxford, 63–90.
