# Supplementary material
Source: PubMed Central journal article supplement (PMC3948807)
Supplement: supp_113.152991_FileS2.pdf [file supp_113.152991_FileS2.pdf]

## File S2

### Details on the algorithm to sample from the inference model

In order to provide a decision criterion for discriminating between neutral and selected markers, we calibrate the Kullback–Leibler divergence (KLD) using simulations from a predictive distribution based on the observed data set. To that end, we generate pseudo-observed data as follows.

We set the hyperparameters  $M_i$ ,  $\pi_j$  and  $\lambda$  to their respective posterior means  $\bar{M}_i$ ,  $\bar{\pi}_j$  and  $\bar{\lambda}$ , as estimated from the MCMC. Then we draw  $\delta_j$  from an exponential distribution  $\sim \exp(\bar{\lambda}^{-1})$  and we draw  $\sigma_{ij}$  from an exponential distribution  $\sim \exp(\delta_j^{-1})$ . Last, the parameter  $\kappa_{ij}$  is drawn from a Bernoulli distribution (with parameter the posterior mean  $\bar{\kappa}_{ij}$ ).

We aim at sampling the allele frequency  $p_{ij}$  from the distribution with density  $f(p_{ij})$  defined by equations 2 and 3 in the main text. Because the cumulative distribution function of the distribution with density  $f(p_{ij})$  is not tractable, we use a rejection-sampling algorithm. To that end, we define an instrumental distribution  $g(p_{ij}) \sim \text{Beta}(M_i\pi_j, M_i(1 - \pi_j))$ , with density:

$$g(p_{ij}) = \frac{\Gamma(M_i)}{\Gamma(M_i\pi_j)\Gamma(M_i(1 - \pi_j))} p_{ij}^{M_i\pi_j - 1} (1 - p_{ij})^{M_i(1 - \pi_j) - 1} \quad (\text{S2.1})$$

We further need to define a constant  $u$ , such that  $f(p_{ij}) \leq [ug(p_{ij})]$  over the support  $[0, 1]$ . Noting that:

$$\frac{f(p_{ij})}{g(p_{ij})} = \frac{\exp(\sigma_{ij}\tilde{p}_{ij})}{{}_1F_1(M_i\tilde{\pi}_{ij}; M_i; \sigma_{ij})} \quad (\text{S2.2})$$

then, if we define  $u \equiv \exp(\sigma_{ij})/{}_1F_1(M_i\tilde{\pi}_{ij}; M_i; \sigma_{ij})$  we get:

$$\frac{f(p_{ij})}{ug(p_{ij})} = \exp(\sigma_{ij}(\tilde{p}_{ij} - 1)) \quad (\text{S2.3})$$

Since  $0 \leq \tilde{p}_{ij} \leq 1$  and  $\sigma_{ij} \geq 0$ , by definition, we have  $\exp(\sigma_{ij}(\tilde{p}_{ij} - 1)) \leq 1$  and therefore  $f(p_{ij}) \leq [ug(p_{ij})]$ . A straightforward algorithm to sample from the distribution with density  $f(p_{ij})$  is then:

- (1) Sample  $x$  from a beta distribution  $\text{Beta}(M_i \pi_j, M_i(1 - \pi_j))$  and  $y$  from  $\mathcal{U}(0, 1)$  (the uniform distribution over the unit interval).
- (2) Check whether or not  $y < f(x)/[ug(x)]$  or equivalently (see equation S2.3) if  $\log(y) < \sigma_{ij}(\tilde{p}_{ij} - 1)$ :
  - If this holds, accept  $x$  and set  $\tilde{p}_{ij} = x$ ;
  - if not, reject the value of  $x$  and repeat the sampling step (1).
- (3) Compute  $p_{ij} = \tilde{p}_{ij}(1 - \kappa_{ij}) + (1 - \tilde{p}_{ij})\kappa_{ij}$ .

Finally, we draw the allele counts  $\mathbf{n}_{ij}$  in the  $i$ th deme at the  $j$ th locus by a random draw from the binomial distribution  $\sim \mathcal{B}(n_{ij}, p_{ij})$ . We repeat this procedure for each locus  $j$  in each deme  $i$ .

This algorithm is computationally efficient, since it avoids computing  ${}_1F_1(M_i \tilde{\pi}_{ij}; M_i; \sigma_{ij})$  (see equations 2 and 3 in the main text). However, the efficiency of the algorithm may be very low for large values of  $\sigma_{ij}$ . This is so because the expected number of iterations required until an  $x$  is successfully generated is exactly the bounding constant  $u \equiv \exp(\sigma_{ij})/{}_1F_1(M_i \tilde{\pi}_{ij}; M_i; \sigma_{ij})$ . Therefore, to avoid the algorithm getting stuck in very long loops, we adopt an alternative strategy whenever  $u > 10^4$ : in such case, we draw  $x$  from a beta distribution  $\text{Beta}(\alpha, \beta)$  with the same first two moments as the target distribution (equations 2 and 3 in the main text). Little algebra shows that:  $\alpha = m_1(m_2 - m_1)/(m_1^2 - m_2)$  and  $\beta = \alpha(1/m_1 - 1)$ , where

$$m_1 = \tilde{\pi}_{ij} \left( \frac{{}_1F_1(M_i \tilde{\pi}_{ij} + 1; M_i + 1; \sigma_{ij})}{{}_1F_1(M_i \tilde{\pi}_{ij}; M_i; \sigma_{ij})} \right) \quad (\text{S2.4})$$

and

$$m_2 = \tilde{\pi}_{ij} \left( \frac{M_i \tilde{\pi}_{ij} + 1}{M_i + 1} \right) \left( \frac{{}_1F_1(M_i \tilde{\pi}_{ij} + 2; M_i + 2; \sigma_{ij})}{{}_1F_1(M_i \tilde{\pi}_{ij}; M_i; \sigma_{ij})} \right) \quad (\text{S2.5})$$
