# Supplementary material
Source: PubMed Central journal article supplement (PMC3948807)
Supplement: supp_113.152991_TableS1.pdf [file supp_113.152991_TableS1.pdf]

**Table S1 False positive rates using two calibration methods**

| Dataset | False positive rate (KLD)            |                |                  |                            |                |                  |
|---------|--------------------------------------|----------------|------------------|----------------------------|----------------|------------------|
|         | Using McCulloch's (1989) calibration |                |                  | Using pseudo-observed data |                |                  |
|         | $\alpha = 5\%$                       | $\alpha = 1\%$ | $\alpha = 0.1\%$ | $\alpha = 5\%$             | $\alpha = 1\%$ | $\alpha = 0.1\%$ |
| 12      | 0.002 (1.164)                        | 0.000 (1.959)  | 0.000 (3.108)    | 2.764 (0.011)              | 0.374 (0.045)  | 0.026 (0.211)    |
| 13      | 0.000 (1.164)                        | 0.000 (1.959)  | 0.000 (3.108)    | 1.226 (0.016)              | 0.076 (0.076)  | 0.004 (0.349)    |
| 14      | 0.016 (1.164)                        | 0.010 (1.959)  | 0.002 (3.108)    | 3.308 (0.035)              | 0.514 (0.174)  | 0.048 (0.801)    |
| 15      | 0.008 (1.164)                        | 0.000 (1.959)  | 0.000 (3.108)    | 1.880 (0.091)              | 0.164 (0.434)  | 0.002 (1.520)    |
| 16      | 0.068 (1.164)                        | 0.008 (1.959)  | 0.000 (3.108)    | 1.722 (0.247)              | 0.194 (0.853)  | 0.008 (2.019)    |
| 17      | 0.140 (1.164)                        | 0.020 (1.959)  | 0.000 (3.108)    | 1.712 (0.374)              | 0.186 (1.047)  | 0.022 (1.942)    |
| 18      | 0.182 (1.164)                        | 0.010 (1.959)  | 0.000 (3.108)    | 1.478 (0.521)              | 0.178 (1.179)  | 0.010 (1.948)    |

Selectim analyses of datasets 12–18. Left-hand side: proportion (%) of markers that were classified as outliers, using the threshold KLD = 1.164, 1.959 and 3.108, which equal the KLD between two Bernoulli distributions corresponding to flipping a fair coin and a biased coin that gives a head with probability 0.05, 0.01 and 0.001, respectively. Right-hand side: proportion (%) of markers that were classified as outliers, using the calibration based on pseudo-observed data (pod). For each dataset and each analysis, a rejection sampling algorithm (see File S2) is used to generate a pod from the joint posterior distribution of the model parameters. The quantiles of the KLD distribution from the pod analysis are then used to calibrate the KLD: the (1 -  $\alpha$ )-quantile of the KLD distribution from the pod analysis provides a  $\alpha$ %-threshold KLD value, which is then used for model choice between selection and neutrality.
