# Supplementary material
Source: PubMed Central journal article supplement (PMC3948807)
Supplement: supp_113.152991_TableS2.pdf [file supp_113.152991_TableS2.pdf]

**Table S2 False positive rates using two calibration methods**

| Dataset      | False positive rate (KLD)            |                |                  |                            |                |                  |
|--------------|--------------------------------------|----------------|------------------|----------------------------|----------------|------------------|
|              | Using McCulloch's (1989) calibration |                |                  | Using pseudo-observed data |                |                  |
|              | $\alpha = 5\%$                       | $\alpha = 1\%$ | $\alpha = 0.1\%$ | $\alpha = 5\%$             | $\alpha = 1\%$ | $\alpha = 0.1\%$ |
| Island model | 0.560 (1.164)                        | 0.050 (1.959)  | 0.000 (3.108)    | 1.960 (0.734)              | 0.250 (1.450)  | 0.010 (2.491)    |
| Hierarchy    | 5.680 (1.164)                        | 1.260 (1.959)  | 0.110 (3.108)    | 5.580 (1.171)              | 1.140 (2.047)  | 0.090 (3.274)    |
| IBD          | 1.900 (1.164)                        | 0.920 (1.959)  | 0.330 (3.108)    | 7.830 (0.121)              | 3.140 (0.655)  | 0.680 (2.346)    |
| Pure drift   | 0.160 (1.164)                        | 0.060 (1.959)  | 0.020 (3.108)    | 2.680 (0.197)              | 0.540 (0.649)  | 0.090 (1.528)    |

SelfEstim analyses of datasets from Figure S19. Left-hand side: proportion (%) of markers that were classified as outliers, using the threshold KLD = 1.164, 1.959 and 3.108, which equal the KLD between two Bernoulli distributions corresponding to flipping a fair coin and a biased coin that gives a head with probability 0.05, 0.01 and 0.001, respectively. Right-hand side: proportion (%) of markers that were classified as outliers, using the calibration based on pseudo-observed data (pod). For each dataset and each analysis, a rejection sampling algorithm (see File S2) is used to generate a pod from the joint posterior distribution of the model parameters. The quantiles of the KLD distribution from the pod analysis are then used to calibrate the KLD: the  $(1 - \alpha)\%$ -quantile of the KLD distribution from the pod analysis provides a  $\alpha\%$ -threshold KLD value, which is then used for model choice between selection and neutrality.
